# Supplementary figures and images for: Fabrication of patterned and anisotropic porous films based on photo-cross-linking of poly(1,2-butadiene) honeycomb films
Source: Royal Society of Chemistry journal article supplement (doi:10.1039/c0jm03840g), 2011-01-01

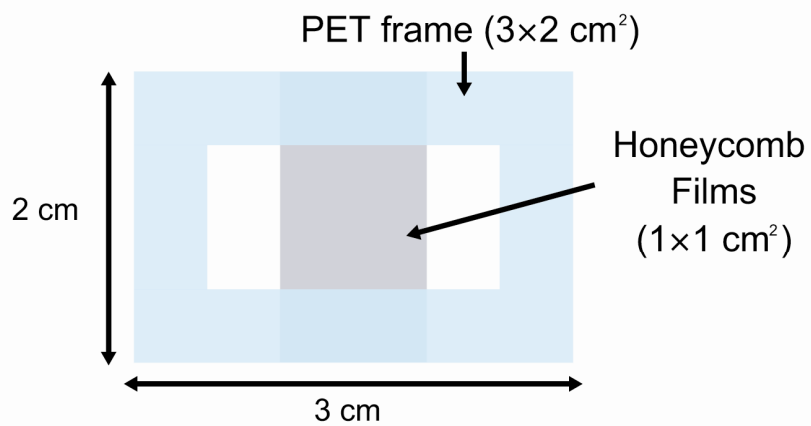

Supporting information 1. An image of the stretching sample of honeycomb films

Supplement: c0jm03840g.pdf [file c0jm03840g.pdf]
